OCTOBER 2019 | VOLUME 176 | NUMBER 10

# The American Journal of Psychiatry

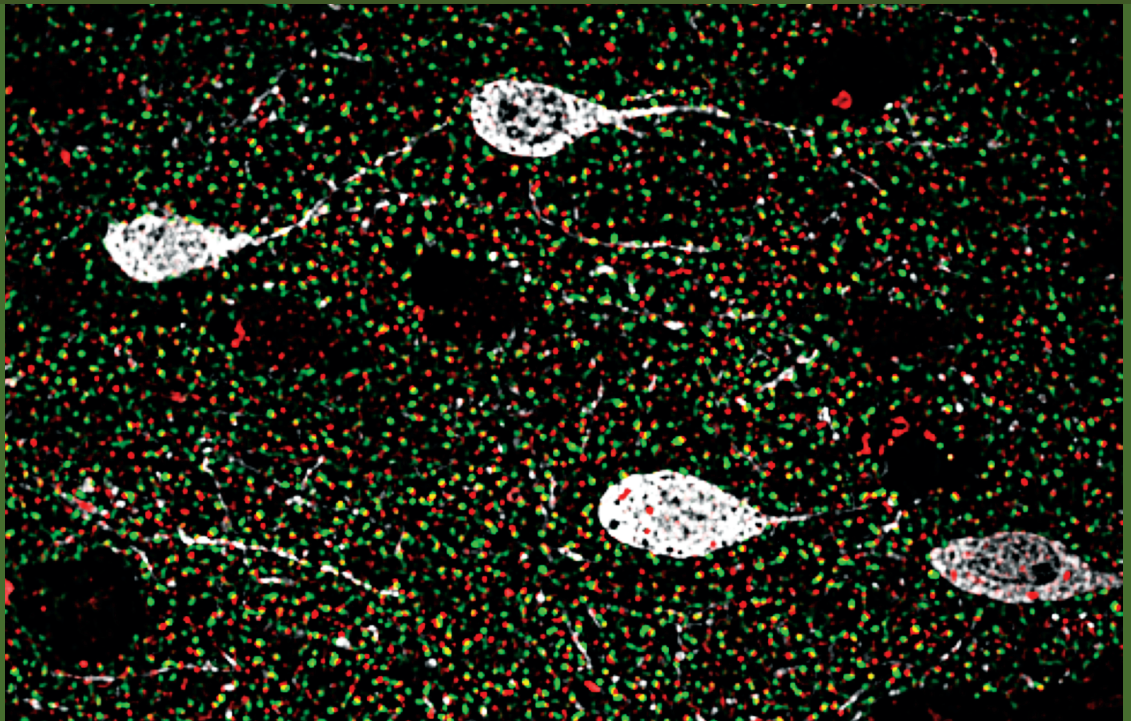

Gaining Ground on Schizophrenia: Conceptualizing How to Use  
Neuroimaging and Genomics in its Diagnosis and Treatment

Early Detection and Preventive Intervention in Schizophrenia:  
From Fantasy to Reality

Cognitive Change in Schizophrenia and Other Psychoses  
in the Decade Following the First Episode

White Matter in Schizophrenia Treatment Resistance

AMERICAN  
**PSYCHIATRIC**  
ASSOCIATION 

[ajp.psychiatryonline.org](http://ajp.psychiatryonline.org)
