## PERSPECTIVAS

### NOTA DEL EDITOR

**771 Ganando terreno a la esquizofrenia: Conceptualización de cómo utilizar las neuroimágenes y la genómica en su diagnóstico y tratamiento**

*Ned H. Kalin, M.D.*

### EDITORIALES

**774 Acerca de la especificidad del deterioro cognitivo continuo en esquizofrenia**

*René S. Kahn, M.D., Ph.D.*

**777 Uso de métricas de difusión avanzadas para investigar la microestructura de la sustancia blanca en individuos en alto riesgo clínico de psicosis**

*Katherine H. Karlsgodt, Ph.D.*

**780 IRM funcional para predecir el resultado de la intervención en psicosis temprana**

*Raquel E. Gur, M.D., Ph.D., Ruben C. Gur, Ph.D.*

**783 Puntuaciones de riesgo poligénico en esquizofrenia: ¿Listas para el mundo real?**

*Elisabeth B. Binder, M.D., Ph.D.*

### TRATAMIENTO EN PSIQUIATRÍA

**785 Delirium**

*Robyn P. Thom, M.D., et al.* **ECM**

### REVISIÓN Y RESEÑAS

**794 Detección temprana e intervención preventiva en esquizofrenia: De la fantasía a la realidad**

*Jeffrey A. Lieberman, M.D., et al.*

[The progress seen in understanding and treatment over the preceding four decades encourages expectations that disease modification and prevention of schizophrenia—via discovery of sensitive and specific diagnostic criteria for pre-syndromal schizophrenia, validated biomarkers, and proven therapeutic strategies—is an achievable goal.]

## NUEVAS INVESTIGACIONES

### ARTÍCULOS

**811 Cambio cognitivo en esquizofrenia y otras psicosis en la década siguiente al primer episodio**

*Jolanta Zanelli, Ph.D., et al.* **EDITORIALE • ECM • AUDIO**

La magnitud del deterioro cognitivo en pacientes con esquizofrenia y otras psicosis después del inicio de la enfermedad varía. Mecanismos diferenciados consiguientes a la enfermedad y/o factores psicosociales pueden subyacer déficits en las diferentes funciones cognitivas.

**820 Sustancia blanca celular alterada pero no agua extracelular libre en IRM por difusión en individuos en alto riesgo clínico de psicosis**

*Yingying Tang, Ph.D., et al.* **EDITORIALE**

La sustancia blanca presenta alteraciones microestructurales en individuos que tienen síntomas psicóticos atenuados, antes del inicio de la psicosis. Dichas alteraciones están asociadas a un deterioro funcional.

**829 La sustancia blanca en la resistencia al tratamiento en esquizofrenia**

*Peter Kochunov, Ph.D., et al.* **VIDEO**

Parte de los orígenes etiopatológicos de la resistencia al tratamiento en esquizofrenia puede estar en los déficits de sustancia blanca.

**839 Actividad BOLD frontoparietal relacionada con la tarea al inicio del estudio, como predictor de mejoría de los síntomas clínicos después de un año de seguimiento en psicosis de inicio reciente**

Jason Smucny, Ph.D., et al. **EDITORIALE • ECM • VIDEO**

Los pacientes con mayor activación frontoparietal durante control cognitivo proactivo tienen una mayor probabilidad de mostrar mejoría en los síntomas después de 1 año y la activación reducida en estos circuitos está asociada a una baja respuesta al tratamiento. Los resultados resaltan la utilidad clínica potencial de las medidas de actividad cerebral relacionada con la cognición, basadas en medidas de IRM funcional.

**846 Penetrancia y pleiotropía de las puntuaciones de riesgo poligénico de esquizofrenia en 106.160 pacientes en cuatro sistemas de salud**

Amanda B. Zheutlin, Ph.D., et al. **EDITORIALE**

Los pacientes con esquizofrenia pueden beneficiarse de la intervención temprana, pero identificar los que tienen un alto riesgo es un reto. El riesgo genético se ha utilizado para este fin en muestras de investigación, pero se desconoce su utilidad para los pacientes en escenarios clínicos del mundo real. La evaluación de historias médicas de más de 100.000 pacientes demostró que los individuos en alto riesgo genético (el 10% más alto) tenían una probabilidad cuatro veces mayor que los individuos con bajo riesgo (el 10% inferior) de que se les diagnosticara esquizofrenia. Sin embargo, el riesgo genético algo se asoció a un riesgo aumentado de muchos otros trastornos psiquiátricos.

**COMUNICADOS Y ACTUALIZACIONES**

**CARTAS AL EDITOR**

**856 [Comment on a Word to the Wise About Intranasal Esketamine]**

Wayne C. Drevets, M.D., et al.

**858 [More Thoughts on Intranasal Esketamine: Response to Drevets et al.]**

Alan F. Schatzberg, M.D.

**ACTOS OFICIALES DE LA APA**

**860 Informes del concejo de la reunión de componentes**

**LA REVISTA DE LOS RESIDENTES**

**880 Número de septiembre 2019 DE LA REVISTA DE LOS RESIDENTES DE LA AJP**

**OTROS TEMAS DE INTERÉS**

**881 Educación Médica Continuada**

**Cubierta:** [Image from the prefrontal cortex of an individual with schizophrenia; labeled neurons are parvalbumin cells, puncta are pre- and post-synaptic markers, and "holes" are unlabeled pyramidal cell bodies. Image provided by Daniel Wonjae Chung, M.D., Ph.D., University of Pittsburgh.]

**AUDIO** Article is highlighted in AJP Audio, a downloadable .mp3 file available at [ajp.psychiatryonline.org](http://ajp.psychiatryonline.org)

**EDITORIALE** Article is discussed in one of the issue's editorials

**EMC** A course covering the content of this article is available online for paid subscribers to the AJP CME Course program

**VIDEO** Article is highlighted online by Deputy Editor Daniel S. Pine, M.D.

**La Tabla de Contenidos y los Resúmenes de Este Número Está Disponible en Español**

[This issue's Table of Contents and Abstracts are available in Spanish]

Translation presented in collaboration with the Office of Global Health, Rutgers-Robert Wood Johnson Medical School. Support for this effort provided by ACTA Colombia.

**Translation courtesy of**

**Sergi Casals, M.A.**, Garuna, Medellín, Colombia ([www.garunaeditors.com](http://www.garunaeditors.com))

**Carlos López Jaramillo, M.D., M.Sc., Ph.D.**, Universidad de Antioquia, Medellín, Colombia

**Javier I. Escobar, M.D., M.Sc.**, Rutgers-Robert Wood Johnson Medical School

## Cambio cognitivo en esquizofrenia y otras psicosis en la década siguiente al primer episodio

Jolanta Zanelli, Ph.D., Josephine Mollon, Ph.D., Sven Sandin, Ph.D., Craig Morgan, Ph.D., Paola Dazzan, M.D., Ph.D., Izabela Pilecka, Ph.D., Tiago Reis Marques, M.D., Ph.D., Anthony S. David, M.D., Kevin Morgan, Ph.D., Paul Fearon, M.D., Ph.D., Gillian A. Doody, M.D., Peter B. Jones, M.D., Ph.D., Robin M. Murray, F.R.S., Abraham Reichenberg, Ph.D.

**Objetivo:** La esquizofrenia está asociada a un deterioro cognitivo pronunciado que en general se cree permanece estable después del inicio de la enfermedad. Sin embargo, hasta la fecha, son escasos los estudios prospectivos de 10 años sobre el funcionamiento cognitivo después del primer episodio utilizando una buena metodología. Los autores examinaron si los pacientes con esquizofrenia experimentan deterioro cognitivo después del primer episodio, si dicho deterioro es generalizado o se limita a funciones neuropsicológicas individuales y si el deterioro es específico de la esquizofrenia.

**Método:** Los participantes forman parte de un estudio de casos y controles basado en la población de pacientes con primer episodio de psicosis a los que se les hizo seguimiento prospectivo hasta por 10 años después de su primero ingreso. Se administró una batería neuropsicológica en la presentación inicial y en el seguimiento a los pacientes con un diagnóstico de esquizofrenia (N=65) u otras psicosis (N=41) y a sujetos sanos de comparación (N=103).

**Resultados:** El grupo con esquizofrenia exhibió deterioros en el CI y en las medidas de conocimiento verbal y de memoria,

pero no en la velocidad de procesamiento ni en las funciones ejecutivas. Los deterioros en la velocidad de procesamiento y las funciones ejecutivas ya estaban presentes en el primer episodio y permanecieron estables. La magnitud de los deterioros osciló entre 0,28 y 0,66 desviaciones estándar. El deterioro en las medidas de memoria no fue específico de la esquizofrenia y también fue visible en el grupo de pacientes con otras psicosis. Los individuos sanos con un CI bajo no mostraron ninguna evidencia de deterioro, lo que sugiere que el deterioro es específico de la psicosis.

**Conclusiones:** Los pacientes con esquizofrenia y otras psicosis experimentan deterioro cognitivo después del inicio de la enfermedad, pero la magnitud del deterioro varía en las diferentes funciones cognitivas. Mecanismos diferenciados consiguientes a la enfermedad y/o factores psicosociales pueden subyacer déficits en las diferentes funciones cognitivas.

(*Am J Psychiatry* 2019; 176:811–819)

## Sustancia blanca celular alterada pero no agua extracelular libre en IRM por difusión en individuos con alto riesgo clínico de psicosis

Yingying Tang, Ph.D., Ofer Pasternak, Ph.D., Marek Kubicki, M.D., Ph.D., Yogesh Rathi, Ph.D., Tianhong Zhang, M.D., Ph.D., Junjie Wang, Ph.D., Huijun Li, Ph.D., Kristen A. Woodberry, M.S.W., Ph.D., Lihua Xu, Ph.D., Zhenying Qian, B.A., Anni Zhu, B.A., Susan Whitfield-Gabrieli, Ph.D., Matcheri S. Keshavan, M.D., Margaret Niznikiewicz, Ph.D., William S. Stone, Ph.D., Robert W. McCarley, M.D., Martha E. Shenton, Ph.D., Jijun Wang, M.D., Ph.D., Larry J. Seidman, Ph.D.

**Objetivo:** Detectar anomalías cerebrales en poblaciones en alto riesgo clínico antes del inicio de la psicosis es importante para rastrear las vías patológicas y para identificar posibles estrategias de intervención que pueden impedir o prevenir el inicio de los trastornos psicóticos. Anteriormente, alteraciones celulares y extracelulares concurrentes han estado implicadas en el inicio de los trastornos psicóticos. Los autores investigaron si las alteraciones celulares y extracelulares ya están presentes en una cohorte clínica de individuos en alto riesgo que experimentan síntomas psicóticos atenuados y cuyos sujetos predominantemente no han sido medicados con anterioridad.

**Método:** Se compararon 50 individuos en alto riesgo clínico, de los cuales 40 nunca habían sido medicados, con 50 sujetos sanos de control, de similares características en cuanto a edad, género y estatus socio-económico de los padres. Se obtuvieron datos de IRM por difusión en 3T *multishell* para estimar medidas de la sustancia blanca en imágenes libres de agua, incluyendo la anisotropía fraccional del tejido celular (FAT, por sus siglas en inglés) y la fracción de volumen del agua extracelular libre (FW, por sus siglas en inglés).

**Resultados:** Se observó una FAT significativamente inferior

en el grupo con alto riesgo clínico en comparación con el grupo sano de control, pero no se observaron alteraciones de FW significativas entre grupos. La FAT más reducida en el grupo con alto riesgo clínico estuvo asociada significativamente con una reducción de la puntuación en la escala de evaluación global del funcionamiento (*Global Assessment of Functioning Scale*, GAF) en comparación con la puntuación GAF más alta en los 12 meses anteriores.

**Conclusiones:** Alteraciones celulares, pero no extracelulares, caracterizaron el grupo con alto riesgo clínico, especialmente en quienes experimentan un deterioro funcional. Estos cambios celulares sugieren un déficit temprano que posiblemente refleja una predisposición a desarrollar síntomas psicóticos atenuados. En cambio, no se observaron alteraciones extracelulares en esta muestra de alto riesgo clínico, lo que sugiere que las anomalías extracelulares reportadas anteriormente pueden reflejar una respuesta aguda a la psicosis, que juega un papel más prominente durante el propio inicio o en un momento cercano al inicio de la psicosis.

(*Am J Psychiatry* 2019; 176:820–828)

## La sustancia blanca en la resistencia al tratamiento en esquizofrenia

Peter Kochunov, Ph.D., Junchao Huang, M.D., Song Chen, M.D., Yanli Li, M.D., Shuping Tan, M.D., Ph.D., Fengmei Fan, Ph.D., Wei Feng, M.D., Yunhui Wang, B.S., Laura M. Rowland, Ph.D., Anya Savransky, B.S., Xiaoming Du, Ph.D., Joshua Chiappelli, M.D., Shuo Chen, Ph.D., Neda Jahanshad, Ph.D., Paul M. Thompson, Ph.D., Meghann C. Ryan, M.S., Bhim Adhikari, Ph.D., Hemalatha Sampath, M.S., Yimin Cui, M.D., Ph.D., Zhiren Wang, M.D., Ph.D., Fude Yang, M.D., Yunlong Tan, M.D., Ph.D., L. Elliot Hong, M.D.

**Objetivo:** El hecho que los medicamentos antipsicóticos no logren resolver los síntomas en pacientes con esquizofrenia representa un reto clínico, conocido como resistencia al tratamiento. Se desconocen las causas de la resistencia al tratamiento, pero esta se asocia al inicio de la enfermedad a una edad más temprana y a déficits cognitivos más severos. Los autores comprobaron la hipótesis que los déficits de sustancia blanca que están implicados tanto en el neurodesarrollo como en la gravedad de los déficits cognitivos en esquizofrenia están asociados a un riesgo más alto de resistencia al tratamiento.

**Método:** La muestra del estudio (N=122; edad media: 38,2 años) incluyó pacientes con esquizofrenia en el inicio del tratamiento (N=45), pacientes cuyos síntomas respondían al tratamiento (N=40) y pacientes cuyos síntomas eran resistentes al tratamiento (N=37), y también sujetos sanos de control (N=78; edad media: 39,2 años). El índice regional de vulnerabilidad de la sustancia blanca (RVI, por sus siglas en inglés) se evaluó como predictor de resistencia al tratamiento y de déficits cognitivos. UN RVI elevado es indicativo de mejor concordancia entre la anisotropía fraccional de imágenes con tensor de difusión en el cerebro en un individuo y el patrón identificado por el meta-análisis más grande hasta

la fecha de déficits de sustancia blanca en esquizofrenia.

**Resultados:** Los pacientes con síntomas resistentes al tratamiento mostraron el RVI de sustancia blanca más elevado (media=0,38 [DE=0,2]), que fue significativamente más alto que el RVI de los pacientes con síntomas que respondían al tratamiento (media=0,30 [DE=0,02]). Al inicio del tratamiento, los pacientes con esquizofrenia mostraron un RVI significativamente más alto que los sujetos control (media=0,18 [DE=0,03] y media=0,13 [DE=0,02], respectivamente). Los RVI estuvieron correlacionados de forma significativa con el desempeño en velocidad de procesamiento y los síntomas negativos.

**Conclusiones:** La esquizofrenia afecta la microestructura de la sustancia blanca en patrones regionales específicos. La susceptibilidad a los déficits de sustancia blanca está asociada con una mayor probabilidad de resistencia al tratamiento. Los desarrollos para superar la resistencia al tratamiento en esquizofrenia deben tener en cuenta la sustancia blanca como un objetivo importante.

(*Am J Psychiatry* 2019; 176:829–838)

## Actividad BOLD frontoparietal relacionada con la tarea al inicio del estudio, como predictor de mejoría de los síntomas clínicos después de un año de seguimiento en psicosis de inicio reciente

Jason Smucny, Ph.D., Tyler A. Lesh, Ph.D., Cameron S. Carter, M.D.

**Objetivo:** El curso temprano de la enfermedad en los trastornos psicóticos es muy variable, y no hay biomarcadores predictivos de la respuesta al tratamiento. La atención en psicosis temprana sigue basándose en ensayo y error y normalmente se obtienen resultados pobres. La predicción temprana de la ausencia de mejoría en respuesta al tratamiento podría ayudar a identificar a los pacientes que podrían beneficiarse de intervenciones alternativas y/o suplementarias. El objetivo de este estudio fue evaluar la capacidad de las medidas de los circuitos cerebrales relacionados con el control cognitivo obtenidas por IRM funcional (IRMf), como punto de partida para predecir la respuesta sintomática en pacientes después de 1 año.

**Método:** Los pacientes con trastornos psicóticos de inicio reciente (<2 años) (N=82) en atención especializada para la psicosis temprana fueron clasificados como «con mejoría» (>20% de mejoría en la puntuación total en la escala breve de evaluación psiquiátrica [BPRS, *Brief Psychiatric Rating Scale*] después de 1 año de seguimiento con respecto al inicio del estudio), o como «sin mejoría». Después se evalua-

ron medidas comportamentales (contexto d') y de IRMf (de activación proactiva asociada al control en regiones de interés a priori) de control cognitivo en cuanto a su capacidad de predecir mejoría en la escala BPRS utilizando regresión logística lineal.

**Resultados:** Las medidas cognitivas asociadas al control predijeron de forma significativa la mejoría en la escala BPRS y en el estatus de los pacientes «con mejoría», con un valor predictivo positivo de 70%. Sólo la medida basada en la IRMf (pero no la medida comportamental) predijo el estatus de manera significativa.

**Conclusiones:** Estos resultados sugieren que la activación frontoparietal durante el desempeño de control cognitivo al inicio del estudio predice la mejoría sintomática subsiguiente durante la atención especializada para psicosis temprana. Se discute posibles implicaciones para el tratamiento personalizado de los pacientes basado en IRMf.

(*Am J Psychiatry* 2019; 176:839–845)

# Penetrancia y pleiotropía de las puntuaciones de riesgo poligénico de esquizofrenia en 106.160 pacientes en cuatro sistemas de salud

Amanda B. Zheutlin, Ph.D., Jessica Dennis, Ph.D., Richard Karlsson Linnér, Ph.D., Arden Moscati, Ph.D., Nicole Restrepo, Ph.D., Peter Straub, M.S., Douglas Ruderfer, Ph.D., Victor M. Castro, Chia-Yen Chen, Sc.D., Tian Ge, Ph.D., Laura M. Huckins, Ph.D., Alexander Charney, M.D., H. Lester Kirchner, Ph.D., Eli A. Stahl, Ph.D., Christopher F. Chabris, Ph.D., Lea K. Davis, Ph.D., Jordan W. Smoller, M.D., Sc.D.

**Objetivo:** Los individuos con alto riesgo de esquizofrenia pueden beneficiarse de la intervención temprana, pero existen pocos predictores de riesgo validados. El perfil genético es un enfoque para la estratificación de riesgos que se ha validado extensivamente en cohortes de investigación. Los autores se propusieron evaluar la utilidad de este enfoque en entornos clínicos y evaluar las consecuencias de salud más amplias del alto riesgo genético de esquizofrenia.

**Método:** Los autores utilizaron las historias clínicas electrónicas de 106.160 pacientes de cuatro sistemas de salud para evaluar la penetrancia y la pleiotropía del riesgo genético de esquizofrenia. Se calcularon puntuaciones de riesgo poligénico (PRS, por sus siglas en inglés) a partir de estadísticas generales y se evaluó su asociación con 1.359 categorías de enfermedad, incluyendo la esquizofrenia y la psicosis, en estudios de asociación del fenoma completo. Los efectos se combinaron por medio de meta-análisis en los diferentes sitios.

**Resultados:** Las puntuaciones PRS estuvieron fuertemente asociadas a la esquizofrenia (aumento de *odds ratio* por des-

viación estándar en PRS: 1,55; IC 95%=1,4; 1,7), y los pacientes en el decil de mayor riesgo de la distribución de puntuaciones PRS tuvieron una oportunidad 4,6 veces mayor de esquizofrenia en comparación con los del decil inferior (IC 95%=2,9; 7,3). Las puntuaciones PRS también estuvieron asociadas de manera positiva a otros fenotipos, incluyendo la ansiedad, el estado de ánimo, el consumo de sustancias, trastornos neurológicos y de personalidad y también conducta suicida, pérdida de memoria y síndromes urinarios; estuvieron relacionados inversamente con la obesidad.

**Conclusiones:** El estudio demuestra que una medida disponible del riesgo genético de esquizofrenia está asociada de manera robusta a la esquizofrenia en entornos de atención sanitaria y tiene efectos pleiotrópicos en trastornos psiquiátricos relacionados y en otros síndromes médicos. Los resultados ofrecen una indicación inicial de las oportunidades y limitaciones que pueden surgir con la futura aplicación de evaluación con puntuaciones PRS en los sistemas de salud.

(*Am J Psychiatry* 2019; 176:846–855)
